# Supplementary material for: Multifunctional and asymmetrically superwettable Janus membrane for all-day freshwater harvesting
Source: Royal Society of Chemistry journal article supplement (doi:10.1039/d2en01099b), 2023-01-01
Supplement: d2en01099b4.pdf [file d2en01099b4.pdf]

## Supporting Information

### **Multifunctional and asymmetrically superwetable Janus membrane for all-day freshwater harvesting**

Minjie Song,<sup>†</sup> Zhigao Zhu\*,<sup>†</sup> Junwen Qi, Yujun Zhou, Jiansheng Li\*

Key Laboratory of New Membrane Materials, Ministry of Industry and Information  
Technology, School of Environmental and Biological Engineering, Nanjing  
University of Science and Technology, Nanjing 210094, China

Emails: zhigaozhu@outlokcom; lijs@njust.edu.cn

<sup>†</sup>These authors contributed equally to this work.

## **Experimental Section**

### **Materials**

Polyvinyl alcohol (PVA, Mw= ~67 000), pyrrole (99.0 %) and (heptadecafluoro-1,1,2,2-tetradecyl) trimethoxysilane (96%, 17-FAS) were purchased from Aladdin Biochemical Technology Co. Ltd. Polyacrylic acid solution (PAA, Mw= ~3 000, 30 wt%), sodium hydroxide (NaOH, 96.0%) and ammonium persulphate ((NH<sub>4</sub>)<sub>2</sub>S<sub>2</sub>O<sub>8</sub>, AR) were purchased from Shanghai Macklin Biochemical Co. Ltd. Ethanol (C<sub>2</sub>H<sub>5</sub>OH, AR) and Hexyl hydride (C<sub>6</sub>H<sub>14</sub>, AR) were purchased from Nanjing Chemical Reagent Co. Ltd. Copper mesh (200#) was purchased from Zhongzhen Copper Technology Co. Ltd. The deionized (DI) water produced from Millipore were used in all experiments.

### **Preparation of the copper hydroxide mesh**

The copper mesh with 3×3 cm<sup>2</sup> was ultrasonically cleaned in DI water and ethanol for five minutes, respectively. After that, the copper mesh was etched in 200 mL solution containing 10 g of NaOH and 4.45 g of (NH<sub>4</sub>)<sub>2</sub>S<sub>2</sub>O<sub>8</sub> for 10 min. Next, the etched copper mesh was washed with DI water for 5 min and then dried at 60°C.

### **Preparation of the superhydrophobic copper mesh with photothermal layer.**

The etched CM was then polymerized in 50 mL solution containing 0.1 g of pyrrole and 0.18 g of (NH<sub>4</sub>)<sub>2</sub>S<sub>2</sub>O<sub>8</sub> for 1 h and dried at 60°C for another 1 h. Then, the polymerized copper mesh was immersed in 1wt% of 17-FAS/n-hexane solution to fabricate a superhydrophobic copper mesh with photothermal characteristics, denoted as SPCM.

### **Fabrication of the SPCM with PVA/PAA interlayer**

0.23 g of PVA and 1.24 g of 30wt% PAA solution were dissolved in 18.53 g DI water to prepare a 3 wt% PVA/PAA solution. Then, ~0.5 g of the solution was sprayed coated on one side of the SPCM and the weighing paper removed the excess solution. In this process, the mass of PVA/PAA deposited onto the SPCM is weighed by a ten thousandth place balance and the basis weight was calculated to be  $0.38 \text{ g m}^{-2}$ . After that, the PVA/PAA coated SPCM was thermally crosslinked at  $100^\circ\text{C}$  for 1 h, denoted as CSPCM.

### **Fabrication of the multifunctional and asymmetrically superwetable Janus membrane.**

Firstly, 0.91 g of PVA and 4.96 g of 30% PAA solution were dissolved in 14.13 g of DI water to obtain a 12 wt% of PVA/PAA solution. Secondly, the as-prepared solution was loaded into a 10 mL syringe, and the coating layer of CSPCM was placed on the rotary drum as the receiver. A high positive voltage of 25 kV and a negative voltage of 5 kV were applied to the needle tip and the collector, respectively. The distance between the needle and the collector was 20 cm. The injection speed was kept at  $0.05 \text{ mm min}^{-1}$ . The spinning process was carried out in an enclosed environment with a humidity of about 45% and a temperature of  $25^\circ\text{C}$ . At last, the PVA/PAA nanofiber layer deposited onto the CSPCM was crosslinked at  $100^\circ\text{C}$  for 1.5 h and the basis weight was calculated to be  $2.82 \text{ g m}^{-2}$ . The obtained sample was denoted as ECSPCM.

### **Characterization**

The surface morphologies of the as-prepared copper meshes were characterized by

scanning electron microscopy (FESEM, JEOL JSM-7800F). The crystal structure of the relevant copper mesh was analyzed with X-ray diffraction (XRD, BURKER D8, Cu Ka). The pore size of the copper mesh and electrospinning layer was characterized by a capillary flow porometer (CFP-1100AI, Porous Materials Inc.). The water wettability was measured by water contact angle measurements using a Krüss DSA30 shape analysis system. The optical properties of the samples were measured by UV-vis absorption spectra (Shimadzu, UV-3600i Plus). The ion concentration of simulation seawater and the collected water was measured by an inductively coupled plasma (ICP) spectrometer (PerkinElmer, AVIO500). The surface characteristic of the crosslinked PPy and PVA/PAA was characterized by the Fourier-transformed infrared (FTIR, (Bruker HYPERION, Germany). The water transportation behavior of relevant samples was recorded by a digital camera (Panasonic, GX9) and an industrial camera (Gaopin, GP-680V).

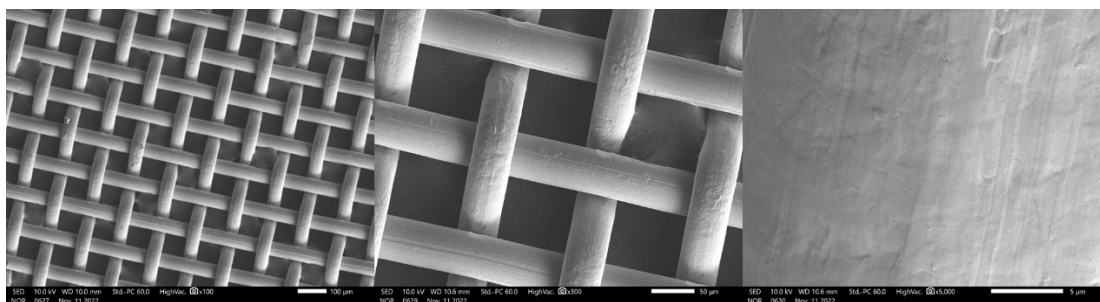

Fig. S1 FE-SEM images of the Cu mesh at different magnifications.

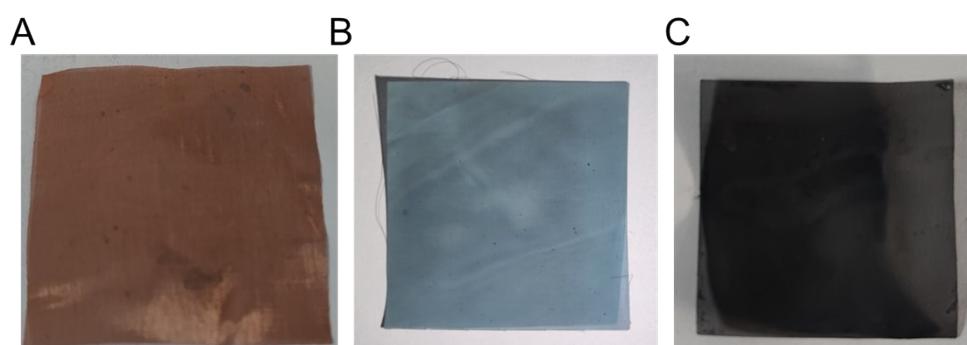

Fig. S2 Photographs of (A) the virgin Cu mesh, (B) the etched Cu mesh and (C) the SPCM.

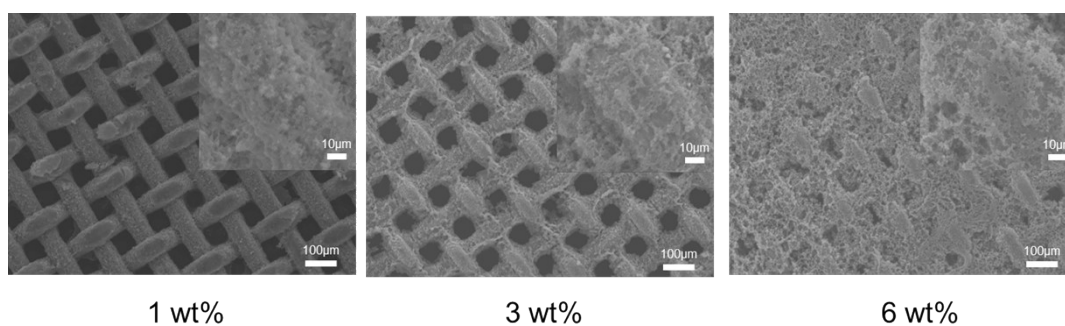

Fig. S3 FE-SEM images of the SPCM mesh after coating with various concentrations of PVA/PAA solution.

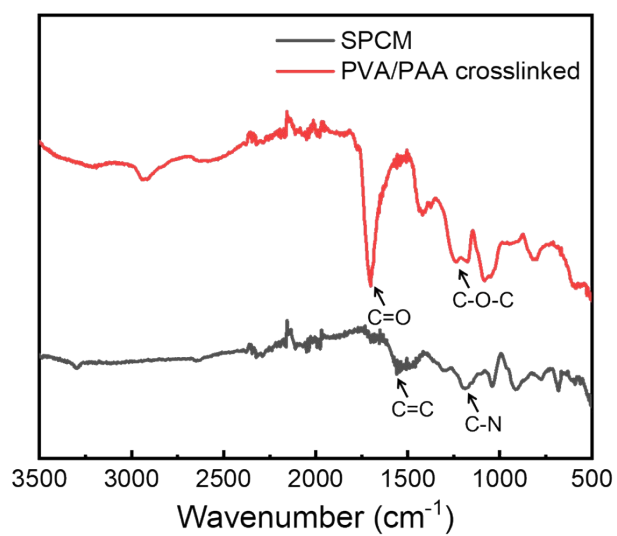

Fig. S4 FT-IR spectra of the crosslinked PVA/PAA and the polymerized PPy.

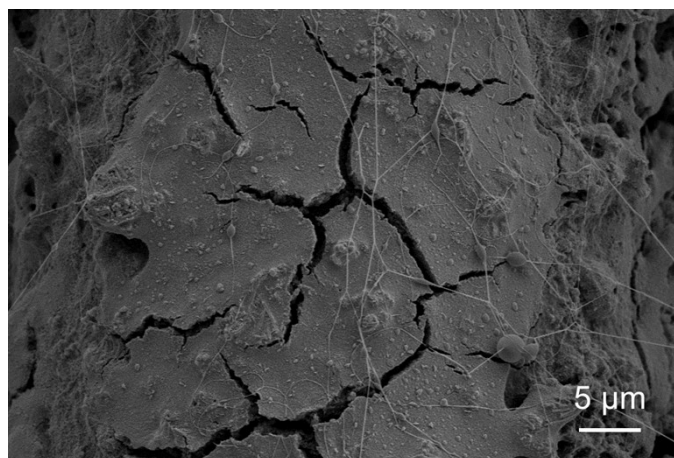

Fig. S5 FE-SEM images of the PVA/PAA nanofibers welded with the PVA/PAA coating layer.

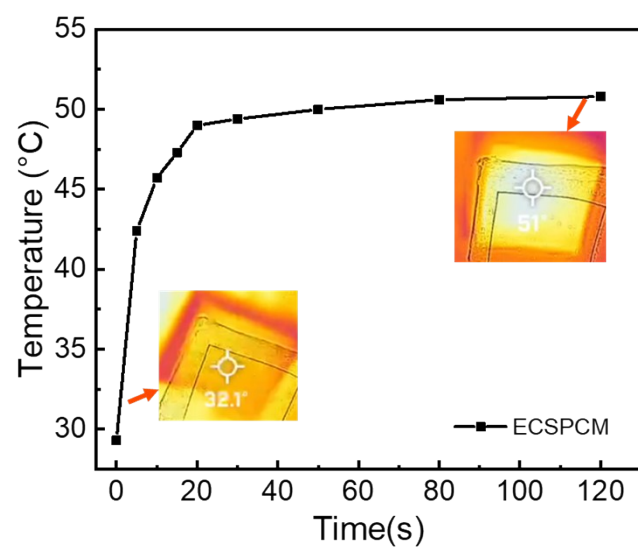

Fig. S6 Temperature–time relationship of the SPCM without contacting water under one simulated solar irradiation.

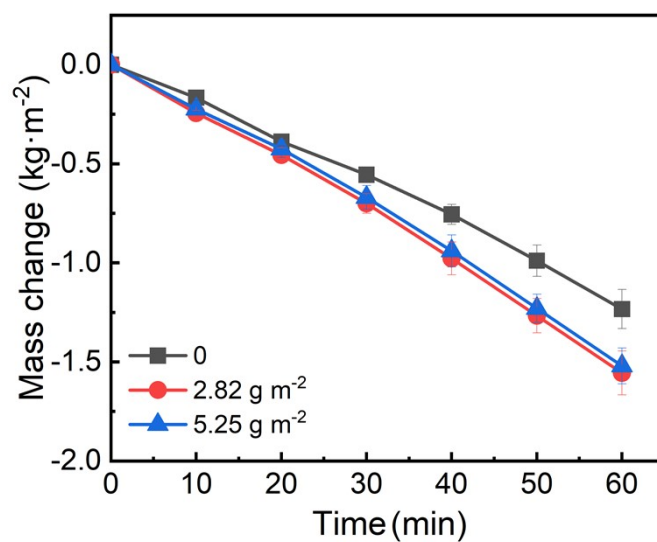

Fig. S7. Variation in water harvesting using ECSPCM membrane with varying basis weight of PVA/PAA nanofiber controlled by electrospinning time.

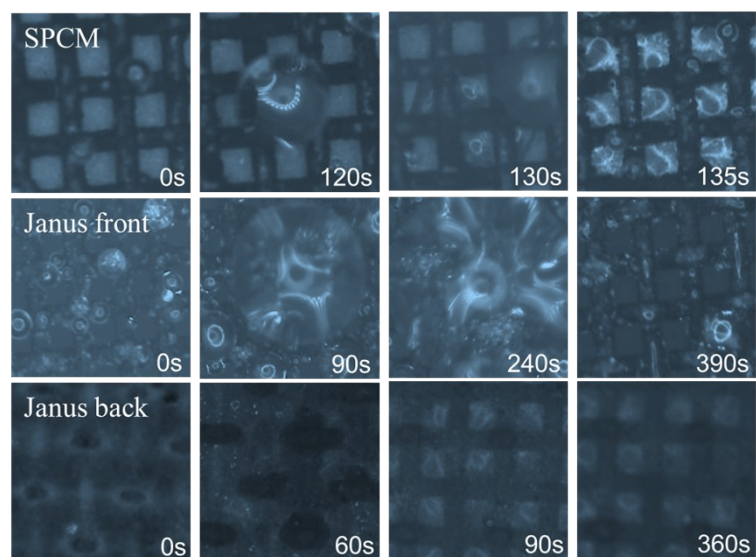

Fig. S8 Dynamic photographs of water droplets captured by the differently wettable interface.



Table S1 Comparison of the solar evaporation and fog harvesting performances with the literature.

| Materials                          | Solar evaporation<br>(kg m <sup>-2</sup> h <sup>-1</sup> ) | Fog harvesting<br>(kg m <sup>-2</sup> h <sup>-1</sup> ) | Ref       |
|------------------------------------|------------------------------------------------------------|---------------------------------------------------------|-----------|
| CuO tree system                    | 1.42                                                       | —                                                       | 1         |
| Pine wood & polydopamine           | 1.38                                                       | —                                                       | 2         |
| PAN@PPy NFs                        | 1.63                                                       | —                                                       | 3         |
| MBE                                | 1.59                                                       | —                                                       | 4         |
| Multilayer PPy nanosheets.         | 1.38                                                       | —                                                       | 5         |
| PVDF-HFP selective absorber        | 1.02                                                       | —                                                       | 6         |
| CF-3                               | 1.47                                                       | —                                                       | 7         |
| Willow catkin biochar              | 1.65                                                       | —                                                       | 8         |
| carbonized lotus seedpod           | 1.30                                                       | —                                                       | 9         |
| Hydrophilic slippery rough surface | —                                                          | 5.03                                                    | 10        |
| Fluorinated-PAN nanofibers         | —                                                          | 3.35                                                    | 11        |
| Cactus-like fog collector          | —                                                          | 5.50                                                    | 12        |
| Cu-x-PFDT-PS-y                     | —                                                          | 1.59                                                    | 13        |
| Antibacterial needle-array (ABN)   | —                                                          | 10.66                                                   | 14        |
| Janus surface                      | —                                                          | 2.00                                                    | 15        |
| CM@PDMS-PS                         | —                                                          | 9.07                                                    | 16        |
| HHNCM                              | —                                                          | 11.11                                                   | 17        |
| MHA/OTS-SiAu <sub>2</sub>          | —                                                          | 10.51                                                   | 18        |
| ECSPCM                             | 1.56                                                       | 11.36                                                   | This work |

## References:

1. Y. Xu, J. Ma, Y. Han, J. Zhang, F. Cui, Y. Zhao, X. Li and W. Wang, Multifunctional CuO nanowire mesh for highly efficient solar evaporation and water purification, *ACS Sustainable Chem. Eng.*, 2019, **7**, 5476-5485.
2. X. Wu, G. Y. Chen, W. Zhang, X. Liu and H. Xu, A plant-transpiration-process-inspired strategy for highly efficient solar evaporation, *Adv. Sustainable Syst.*, 2017, **1**, 1700046.
3. X. Ren, S. Cui, J. Guan, H. Yin, H. Yuan and S. An, PAN@ PPy nanofibrous membrane with core-sheath structure for solar water evaporation, *Mater. Lett.*, 2022, **313**, 131807.
4. H.-Y. Zhao, J. Zhou, Z.-L. Yu, L.-F. Chen, H.-J. Zhan, H.-W. Zhu, J. Huang, L.-A. Shi and S.-H. Yu, Lotus-inspired evaporator with Janus wettability and bimodal pores for solar steam generation, *Cell Rep. Phys. Sci.*, 2020, **1**, 100074.
5. X. Wang, Q. Liu, S. Wu, B. Xu and H. Xu, Multilayer polypyrrole nanosheets with self-organized surface structures for flexible and efficient solar-thermal energy conversion, *Adv. Mater.*, 2019, **31**, 1807716.
6. G. Xue, Q. Chen, S. Lin, J. Duan, P. Yang, K. Liu, J. Li and J. Zhou, Highly efficient water harvesting with optimized solar thermal membrane distillation device, *Glob. Chall.*, 2018, **2**, 1800001.
7. T. Li, Q. Fang, X. Xi, Y. Chen and F. Liu, Ultra-robust carbon fibers for multi-media purification via solar-evaporation, *J. Mater. Chem. A*, 2019, **7**, 586-593.
8. S. Zhang, L. Zang, T. Dou, J. Zou, Y. Zhang and L. Sun, Willow catkins-derived porous

- carbon membrane with hydrophilic property for efficient solar steam generation, *ACS omega*, 2020, **5**, 2878-2885.
9. J. Fang, J. Liu, J. Gu, Q. Liu, W. Zhang, H. Su and D. Zhang, Hierarchical porous carbonized lotus seedpods for highly efficient solar steam generation, *Chem. Mater.*, 2018, **30**, 6217-6221.
  10. X. Dai, N. Sun, S. O. Nielsen, B. B. Stogin, J. Wang, S. Yang and T.-S. Wong, Hydrophilic directional slippery rough surfaces for water harvesting, *Sci. Adv.*, 2018, **4**, eaaq0919.
  11. A. Almasian, G. C. Fard, M. Mirjalili and M. P. Gashti, Fluorinated-PAN nanofibers: Preparation, optimization, characterization and fog harvesting property, *J. Indus. Eng. Chem.*, 2018, **62**, 146-155.
  12. J. Wang, S. Yi, Z. Yang, Y. Chen, L. Jiang and C.-P. Wong, Laser direct structuring of bioinspired spine with backward microbarbs and hierarchical microchannels for ultrafast water transport and efficient fog harvesting, *ACS Appl. Mater. Interfaces*, 2020, **12**, 21080-21087.
  13. Y. Wang, L. Zhang, J. Wu, M. N. Hedhili and P. Wang, A facile strategy for the fabrication of a bioinspired hydrophilic–superhydrophobic patterned surface for highly efficient fog-harvesting, *J. Mater. Chem. A*, 2015, **3**, 18963-18969.
  14. C. Wen, H. Guo, H. Bai, T. Xu, M. Liu, J. Yang, Y. Zhu, W. Zhao, J. Zhang and M. Cao, Beetle-inspired hierarchical antibacterial interface for reliable fog harvesting, *ACS Appl. Mater. Interfaces*, 2019, **11**, 34330-34337.
  15. K. Yin, H. Du, X. Dong, C. Wang, J.-A. Duan and J. He, A simple way to achieve bioinspired hybrid wettability surface with micro/nanopatterns for efficient fog collection, *Nanoscale*, 2017, **9**, 14620-14626.
  16. Y. Zhang, N. Meng, A. A. Babar, X. Wang, J. Yu and B. Ding, Lizard-skin-inspired nanofibrous capillary network combined with a slippery surface for efficient fog collection, *ACS Appl. Mater. Interfaces*, 2021, **13**, 36587-36594.
  17. Y. Zhang, N. Meng, A. A. Babar, X. Wang, J. Yu and B. Ding, Multi-bioinspired and multistructural integrated patterned nanofibrous surface for spontaneous and efficient fog collection, *Nano Lett.*, 2021, **21**, 7806-7814.
  18. B. Malani S and P. Viswanath, Wettability contrast in the hexagonally patterned gold substrate of distinct morphologies for enhanced fog harvesting, *Langmuir*, 2021, **37**, 8281-8289.
